# Supplementary material for: High performance polarization-sensitive self-powered imaging photodetectors based on a p-Te/n-MoSe2van der Waals heterojunction with strong interlayer transition
Source: Royal Society of Chemistry journal article supplement (doi:10.1039/d1mh01287h), 2021-01-01
Supplement: d1mh01287h1.pdf [file d1mh01287h1.pdf]

## Supporting Information

### High Performance Polarization-sensitive Self-Powered Imaging photodetectors based on p-Te/n-MoSe<sub>2</sub> van der Waals Heterojunction with strong interlayer transition

Qixiao Zhao,<sup>ab</sup> Feng Gao,<sup>c</sup> Hongyu Chen,<sup>\*ab</sup> Wei Gao,<sup>ab</sup> Mengjia Xia,<sup>ab</sup> Yuan Pan,<sup>ab</sup> Hongyan Shi,<sup>d</sup> Shichen Su,<sup>abe</sup> Xiaosheng Fang,<sup>\*f</sup> and Jingbo Li<sup>\*ab</sup>

- a. Institute of Semiconductor Science and Technology, South China Normal University, Guangzhou 510631, P.R. China.
- b. Guangdong Province Key Lab of Chip and Integration Technology, Guangzhou 510631, P.R. China.
- c. Key Laboratory of Micro-systems and Micro-structures Manufacturing of Ministry of Education, Harbin Institute of Technology, Harbin 150080, P.R. China.
- d. Department of Physics, Harbin Institute of Technology, Harbin 150080, P. R. China.
- e. SCNU Qingyuan Institute of Science and Technology Innovation Co., Ltd, Qingyuan 511517, P. R. China.
- f. Department of Materials Science, Fudan University, Shanghai 200433, P. R. China.

Email: [chenhy@m.scnu.edu.cn](mailto:chenhy@m.scnu.edu.cn); [xshfang@fudan.edu.cn](mailto:xshfang@fudan.edu.cn); [jbli@m.scnu.edu.cn](mailto:jbli@m.scnu.edu.cn)

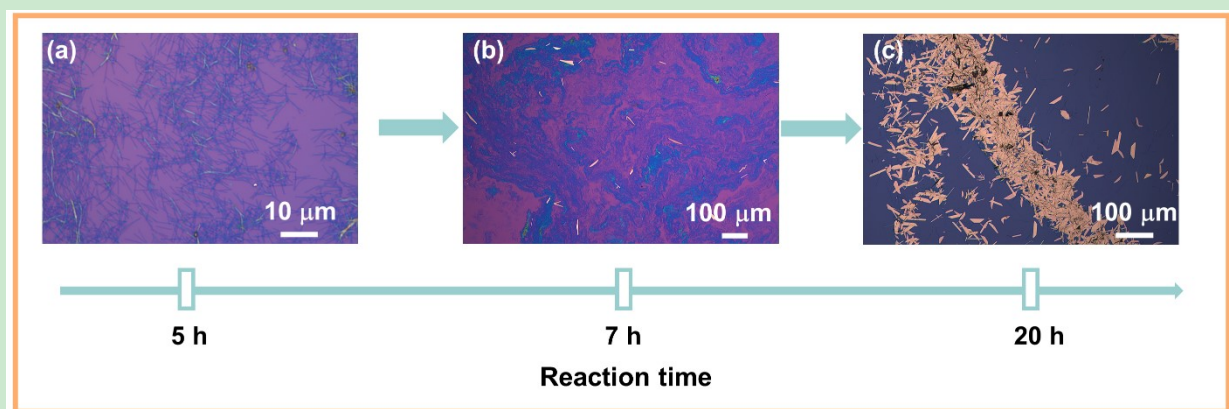

**Fig. S1** Growth mechanism of solution-grown Te nanosheets. (a-c) Optical image of morphology evolution from the nanowire (a) through intermediate state (b) to the nanosheets (c) of Te grown by solution-grown.

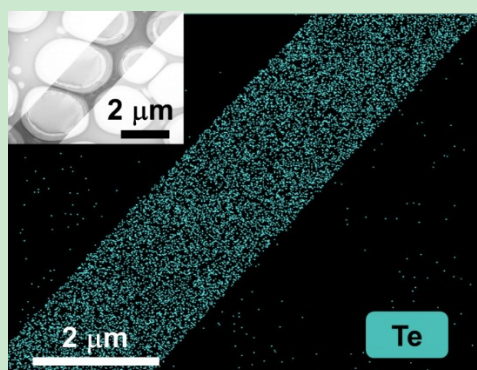

**Fig. S2** EDS elemental mapping for Te nanosheet. Inset: low- magnification TEM image of Te nanosheet.

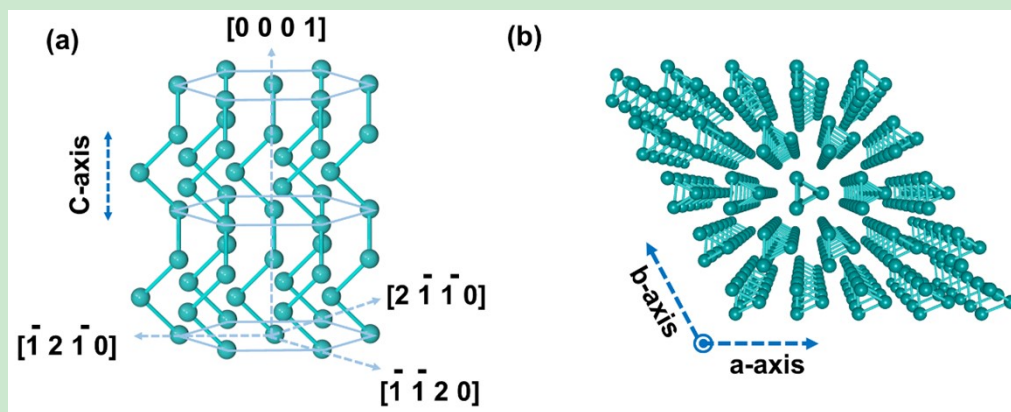

**Fig. S3** Nanostructure for 2D Te nanosheet. (a-b) Crystal structure of Te nanosheet viewed from the b-axis (a) and viewed from the c-axis (b).

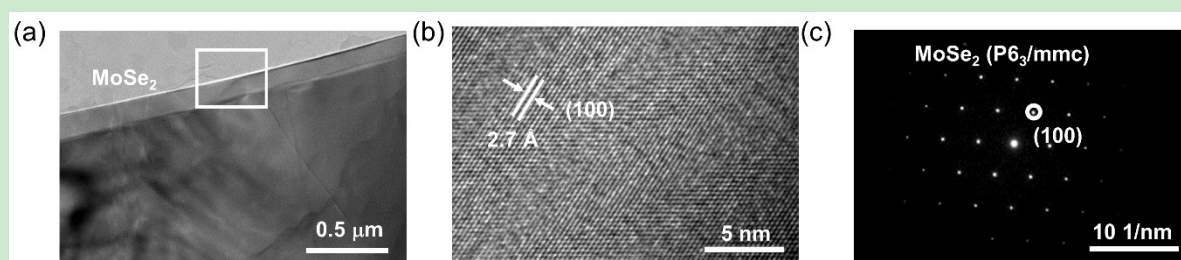

**Fig. S4** Material characterization of MoSe<sub>2</sub> nanosheet. (a) Low-magnification TEM image of MoSe<sub>2</sub> nanosheet. (b) HR-TEM image taken from the MoSe<sub>2</sub> nanosheet. (c) Diffraction pattern of MoSe<sub>2</sub> nanosheet.

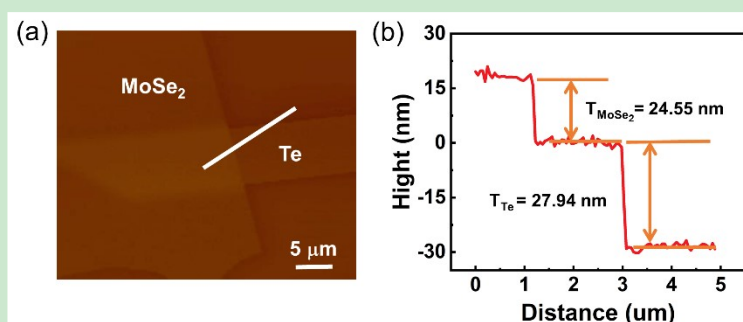

**Fig. S5** AFM image of p-Te/n-MoSe<sub>2</sub> heterojunction device.

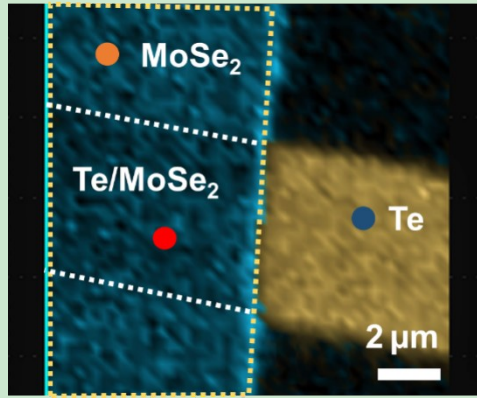

**Fig. S6** Raman intensity mapping collected at  $A_1$  (Te:  $119\text{ cm}^{-1}$ ) and  $A_{1g}$  ( $\text{MoSe}_2$ :  $238\text{ cm}^{-1}$ ).

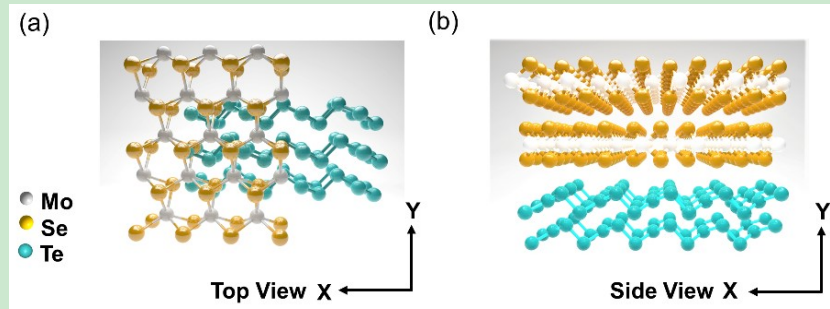

**Fig. S7** Top view (a) and side view (b) crystal structure of p-Te/n- $\text{MoSe}_2$  heterojunction.

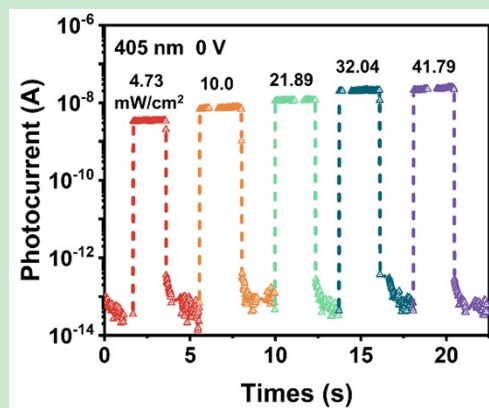

**Fig. S8** Time-resolved photovoltaic response of the heterostructure under different laser powers intensity of 405 nm at  $V = 0\text{ V}$ .

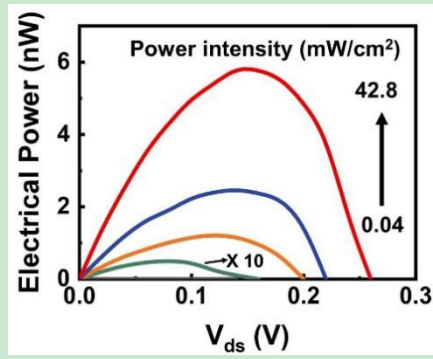

Fig. S9 Electrical power under varied power intensities (405 nm).

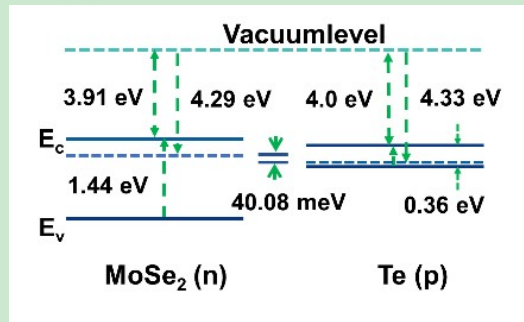

Fig. S10 Band alignment of p-Te/n-MoSe<sub>2</sub> heterostructure before contact.

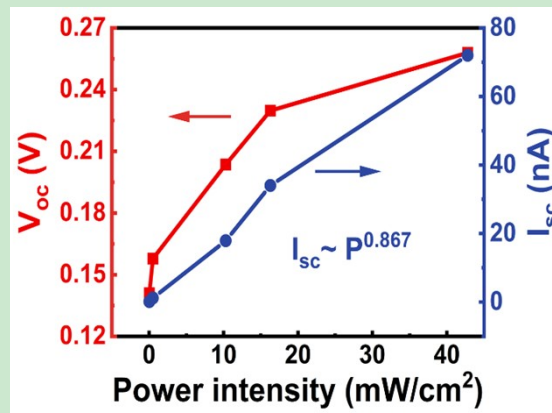

Fig. S11 Extracted  $I_{sc}$  and  $V_{oc}$  under different laser powers intensity of 405 nm.

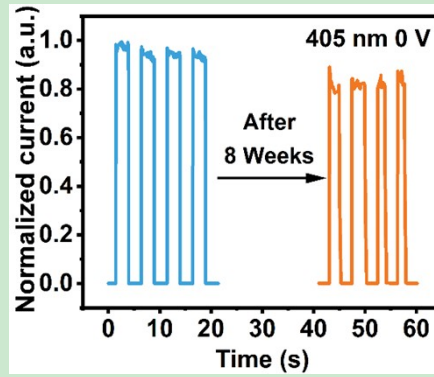

**Fig. S12** Time-dependent photoresponse of the p-Te/n-MoSe<sub>2</sub> photodetector at zero bias voltage after 8 weeks storage.

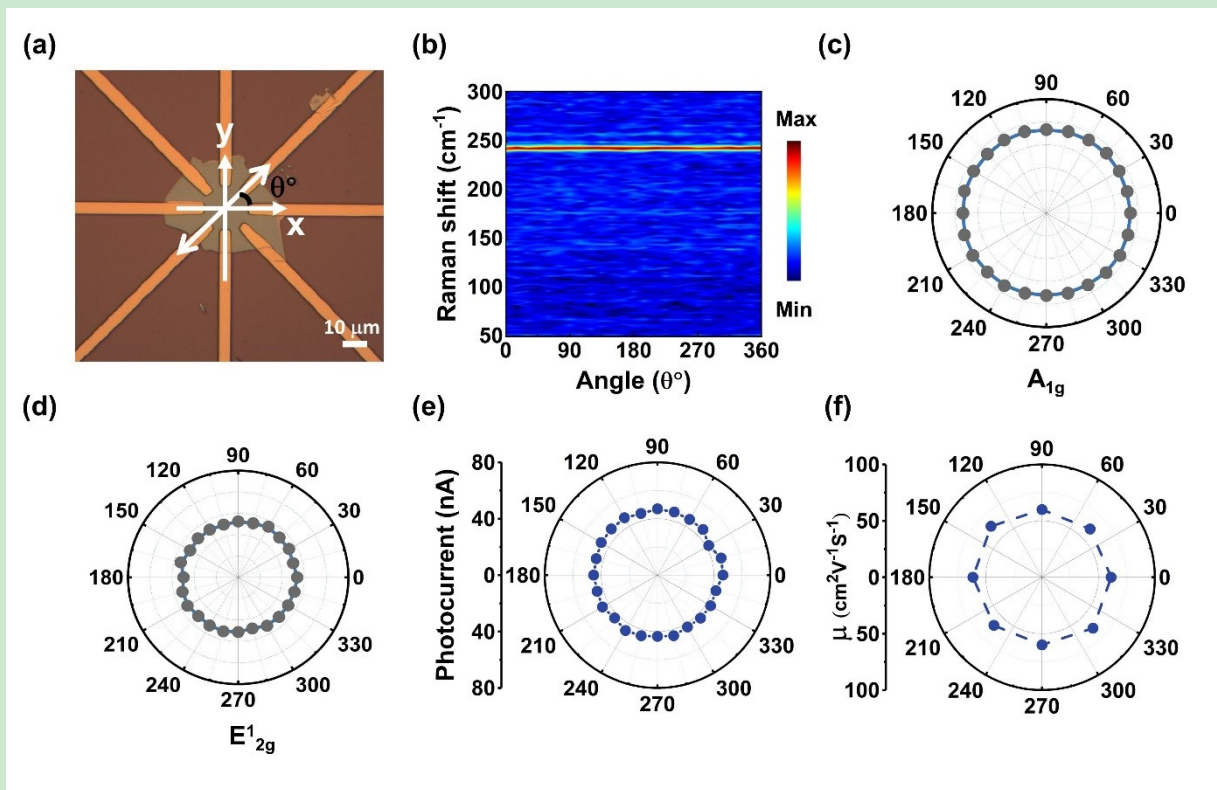

**Fig. S13** (a) Optical image of the fabricated MoSe<sub>2</sub> FET device. (b) Polarized Raman intensity mapping of MoSe<sub>2</sub> nanosheet as a function of wave number and incident angle. (c) Polar plot of A<sub>1g</sub> mode intensity in cross-polarized configurations. (d) Polar plot of E<sub>12g</sub> mode intensity in cross-polarized configurations. (e) Polar diagram of the polarized photocurrent for the incident wavelengths of 405 nm (0.3 mW/cm<sup>2</sup>) at 1 V. (f) Polar plots of the angle-dependent mobility as a function of the polarization angle.



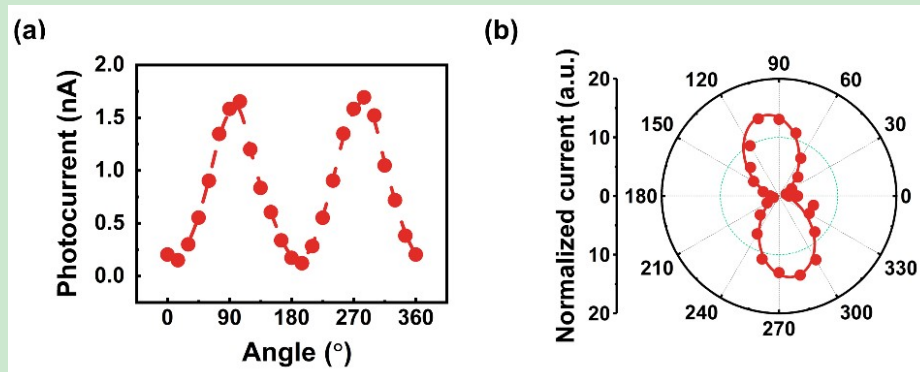

**Fig. S14** Polarization-sensitive photodetection of p-Te/n-MoSe<sub>2</sub> heterostructure. (a) Polarized photocurrent under 0 V for the incident wavelengths 635 nm (5.968 mW/cm<sup>2</sup>). (b) Polar diagram of the polarized photocurrent for the incident wavelengths of 635 nm at zero bias voltage, and the anisotropic ratio are 13.97.

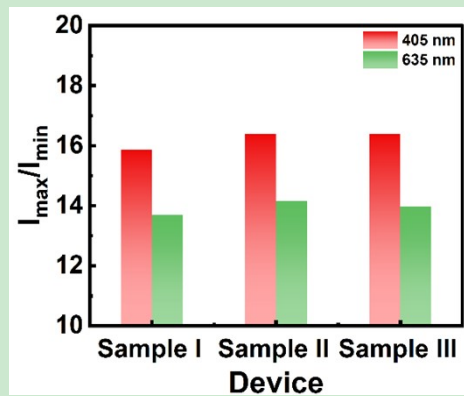

**Fig. S15** The anisotropic ratio of another three constructed p-Te/n-MoSe<sub>2</sub> heterojunction device.

**Table S1** Comparison of the device performances with previously reported 2D material-based photodetectors.

| Material                                                 | Wavelength (nm) | voltage (V) | Responsivity (R) (mA W <sup>-1</sup> ) | Detectivity (D*) (Jones) | On/off ratio          | Anisotropic ratio | Ref       |
|----------------------------------------------------------|-----------------|-------------|----------------------------------------|--------------------------|-----------------------|-------------------|-----------|
| Te/MoSe <sub>2</sub>                                     | 405             | 0           | 2106                                   | ≈ 10 <sup>13</sup>       | ~10 <sup>5</sup>      | 15.87             | This work |
| Te                                                       | 1550            | 1           | 4.56 x 10 <sup>2</sup>                 | -                        | -                     | 2.39              | 1         |
| Te                                                       | 400-1700        | 5           | 1.6 x 10 <sup>4</sup>                  | 2.9 x 10 <sup>9</sup>    | 3 x 10 <sup>3</sup>   | 0.95              | 2         |
| MoS <sub>2</sub>                                         | 400-520         | 2           | 3500                                   | 2 x 10 <sup>11</sup>     | -                     | 2                 | 3         |
| Black phosphorus                                         | 1550            | 0.15        | 14.2                                   | -                        | -                     | 8.7               | 4         |
| 1T'-MoTe <sub>2</sub> /T <sub>d</sub> -MoTe <sub>2</sub> | 532-1060        | 0           | 0.4                                    | 1.07 x 10 <sup>8</sup>   | -                     | 2.72              | 5         |
| GeSe/MoS <sub>2</sub>                                    | 380-1064        | 0           | 105                                    | 1.46 x 10 <sup>10</sup>  | 3.6 x 10 <sup>4</sup> | 2.95              | 6         |
| MoS <sub>2</sub> /GaAs                                   | 780             | 0           | 35.2                                   | 1.96 x 10 <sup>13</sup>  |                       | 4.8               | 7         |

## References

- 1 L. Tong, X. Huang, P. Wang, L. Ye, M. Peng, L. An, Q. Sun, Y. Zhang, G. Yang, Z. Li, F. Zhong, F. Wang, Y. Wang, M. Motlag, W. Wu, G. J. Cheng, W. Hu, Nat. Commun. 2020, **11**, 2308.
- 2 M. Amani, C. Tan, G. Zhang, C. Zhao, J. Bullock, X. Song, H. Kim, V. R. Shrestha, Y. Gao, K. B. Crozier, M. Scott, A. Javey, ACS Nano 2018, **12**, 7253.
- 3 L. Tong, X. Duan, L. Song, T. Liu, L. Ye, X. Huang, P. Wang, Y. Sun, X. He, L. Zhang, K. Xu, W. Hu, J. Xu, J. Zang, G. J. Cheng, Applied Materials Today 2019, **15**, 203.
- 4 P. K. Venuthurumilli, P. D. Ye, X. Xu, ACS Nano 2018, **12**, 4861.
- 5 J. Lai, X. Liu, J. Ma, Q. Wang, K. Zhang, X. Ren, Y. Liu, Q. Gu, X. Zhuo, W. Lu, Y. Wu, Y. Li, J. Feng, S. Zhou, J. Chen, D. Sun, Adv. Mater. 2018, **30**, 1707152.
- 6 Y. Xin, X. Wang, Z. Chen, D. Weller, Y. Wang, L. Shi, X. Ma, C. Ding, W. Li, S. Guo, R. Liu, ACS Appl. Mater. Inter. 2020, **12**, 15406.
- 7 C. Jia, D. Wu, E. Wu, J. Guo, Z. Zhao, Z. Shi, T. Xu, X. Huang, Y. Tian, X. Li, J. Mater. Chem. C. 2019, **7**, 3817.
